# Supplementary material
Source: publisher figshare collection journal article supplement (https://acs.figshare.com/ndownloader/files/4666291)
Supplement: Supplementary file 1 [file 4666291]

#Sihai Yang, Guobao Li*, Shujian Tian, Fuhui Liao, 
# Ming Xiong, Jianhua Lin*
#Synthesis and Structural Characterisation of a Series 
#of One-Dimensional Fluorotitanophosphates
#(NH4)xK4-x[Ti2PO4F9] (x=0, 0.70, 1.00, 1.25) 
 
 
data_3k
 
_audit_creation_method            SHELXL-97
_chemical_name_systematic
;
 ?
;
_chemical_name_common             ?
_chemical_melting_point           ?
_chemical_formula_moiety          ?
_chemical_formula_sum
 'F9 H2.80 K3.30 N0.70 O4 P Ti2'
_chemical_formula_weight          503.43
 
loop_
 _atom_type_symbol
 _atom_type_description
 _atom_type_scat_dispersion_real
 _atom_type_scat_dispersion_imag
 _atom_type_scat_source
 'N'  'N'   0.0061   0.0033
 'International Tables Vol C Tables 4.2.6.8 and 6.1.1.4'
 'H'  'H'   0.0000   0.0000
 'International Tables Vol C Tables 4.2.6.8 and 6.1.1.4'
 'O'  'O'   0.0106   0.0060
 'International Tables Vol C Tables 4.2.6.8 and 6.1.1.4'
 'F'  'F'   0.0171   0.0103
 'International Tables Vol C Tables 4.2.6.8 and 6.1.1.4'
 'P'  'P'   0.1023   0.0942
 'International Tables Vol C Tables 4.2.6.8 and 6.1.1.4'
 'K'  'K'   0.2009   0.2494
 'International Tables Vol C Tables 4.2.6.8 and 6.1.1.4'
 'Ti'  'Ti'   0.2776   0.4457
 'International Tables Vol C Tables 4.2.6.8 and 6.1.1.4'
 
_symmetry_cell_setting            'monoclinic' 
_symmetry_space_group_name_H-M    'P 21/m' 
 
loop_
 _symmetry_equiv_pos_as_xyz
 'x, y, z'
 '-x, y+1/2, -z'
 '-x, -y, -z'
 'x, -y-1/2, z'
 
_cell_length_a                    5.8854(12)
_cell_length_b                    11.014(2)
_cell_length_c                    10.227(2)
_cell_angle_alpha                 90.00
_cell_angle_beta                  105.99(3)
_cell_angle_gamma                 90.00
_cell_volume                      637.3(2)
_cell_formula_units_Z             2
_cell_measurement_temperature     298(2)
_cell_measurement_reflns_used     ?
_cell_measurement_theta_min       2
_cell_measurement_theta_max       25.5
 
_exptl_crystal_description        'block' 
_exptl_crystal_colour             'colorless'
_exptl_crystal_size_max           0.4
_exptl_crystal_size_mid           0.3
_exptl_crystal_size_min           0.2
_exptl_crystal_density_meas       ?
_exptl_crystal_density_diffrn     2.623
_exptl_crystal_density_method     'not measured'
_exptl_crystal_F_000              484.8
_exptl_absorpt_coefficient_mu     2.575
_exptl_absorpt_correction_type    'psi-scan' 
_exptl_absorpt_correction_T_min   0.400
_exptl_absorpt_correction_T_max   0.590
_exptl_absorpt_process_details    'teXsan (MSC, 1992-1997)'
 
_exptl_special_details
;
 ?
;
 
_diffrn_ambient_temperature       298(2)
_diffrn_radiation_wavelength      0.71073
_diffrn_radiation_type            MoK\a
_diffrn_radiation_source          'fine-focus sealed tube'
_diffrn_radiation_monochromator   graphite
_diffrn_measurement_device_type   'Rigaku AFC6S'
_diffrn_measurement_method        \w-2\q
_diffrn_detector_area_resol_mean  ?
_diffrn_standards_number          3
_diffrn_standards_interval_count  150
_diffrn_standards_interval_time   ?
_diffrn_standards_decay_%         ?
_diffrn_reflns_number             1375
_diffrn_reflns_av_R_equivalents   0.0167
_diffrn_reflns_av_sigmaI/netI     0.0149
_diffrn_reflns_limit_h_min        0
_diffrn_reflns_limit_h_max        7
_diffrn_reflns_limit_k_min        0
_diffrn_reflns_limit_k_max        13
_diffrn_reflns_limit_l_min        -12
_diffrn_reflns_limit_l_max        11
_diffrn_reflns_theta_min          2.07
_diffrn_reflns_theta_max          25.49
_reflns_number_total              1252
_reflns_number_gt                 1163
_reflns_threshold_expression      >2sigma(I)
 
_computing_data_collection        'MSC/AFC Diffractometer Control'
_computing_cell_refinement        'MSC/AFC Diffractometer Control'
_computing_data_reduction         'teXsan (MSC, 1992-1997)'
_computing_structure_solution     'Bruker SHELXTL'
_computing_structure_refinement   'SHELXL-97 (Sheldrick, 1997)'
_computing_molecular_graphics     'Bruker SHELXTL'
_computing_publication_material   'Bruker SHELXTL'
 
_refine_special_details
;
 Refinement of F^2^ against ALL reflections.  The weighted R-factor wR and
 goodness of fit S are based on F^2^, conventional R-factors R are based
 on F, with F set to zero for negative F^2^. The threshold expression of
 F^2^ > 2sigma(F^2^) is used only for calculating R-factors(gt) etc. and is
 not relevant to the choice of reflections for refinement.  R-factors based
 on F^2^ are statistically about twice as large as those based on F, and R-
 factors based on ALL data will be even larger.
;
 
_refine_ls_structure_factor_coef  Fsqd
_refine_ls_matrix_type            full
_refine_ls_weighting_scheme       calc
_refine_ls_weighting_details
 'calc w=1/[\s^2^(Fo^2^)+(0.0353P)^2^+10.0744P] where P=(Fo^2^+2Fc^2^)/3'
_atom_sites_solution_primary      direct
_atom_sites_solution_secondary    difmap
_atom_sites_solution_hydrogens    geom
_refine_ls_hydrogen_treatment     constr
_refine_ls_extinction_method      SHELXL
_refine_ls_extinction_coef        ?
_refine_ls_number_reflns          1252
_refine_ls_number_parameters      103
_refine_ls_number_restraints      0
_refine_ls_R_factor_all           0.0502
_refine_ls_R_factor_gt            0.0474
_refine_ls_wR_factor_ref          0.1261
_refine_ls_wR_factor_gt           0.1245
_refine_ls_goodness_of_fit_ref    1.000
_refine_ls_restrained_S_all       1.000
_refine_ls_shift/su_max           0.000
_refine_ls_shift/su_mean          0.000
 
loop_
 _atom_site_label
 _atom_site_type_symbol
 _atom_site_fract_x
 _atom_site_fract_y
 _atom_site_fract_z
 _atom_site_U_iso_or_equiv
 _atom_site_adp_type
 _atom_site_occupancy
 _atom_site_symmetry_multiplicity
 _atom_site_calc_flag
 _atom_site_refinement_flags
 _atom_site_disorder_assembly
 _atom_site_disorder_group
Ti1 Ti 0.0000 0.0000 0.0000 0.0133(3) Uani 1 2 d S . .
Ti2 Ti 0.2804(2) 0.2500 0.51367(14) 0.0146(3) Uani 1 2 d S . .
P1 P 0.0579(4) 0.2500 0.18508(19) 0.0128(4) Uani 1 2 d S . .
K1 K -0.3561(4) 0.04835(18) 0.3165(2) 0.0324(5) Uani 0.65 1 d P . .
N1 N -0.3561(4) 0.04835(18) 0.3165(2) 0.0324(5) Uani 0.35 1 d P . .
H1A H -0.2641 0.0173 0.3891 0.039 Uiso 0.35 1 d P . .
H1B H -0.2644 0.0883 0.2796 0.039 Uiso 0.35 1 d P . .
H1C H -0.4071 -0.0105 0.2609 0.039 Uiso 0.35 1 d P . .
H1D H -0.4619 0.0971 0.3295 0.039 Uiso 0.35 1 d P . .
K2 K 0.4523(3) 0.2500 -0.03107(19) 0.0271(5) Uani 1 2 d S . .
K3 K -0.1278(4) 0.2500 0.7190(2) 0.0324(5) Uani 1 2 d S . .
F1 F -0.2654(7) 0.0852(4) -0.0971(4) 0.0407(10) Uani 1 1 d . . .
F2 F 0.1593(7) 0.0540(4) -0.1233(4) 0.0361(10) Uani 1 1 d . . .
F3 F 0.0566(6) 0.1325(4) 0.5065(5) 0.0381(10) Uani 1 1 d . . .
F4 F 0.5175(6) 0.1326(3) 0.5394(4) 0.0281(8) Uani 1 1 d . . .
F5 F 0.3350(10) 0.2500 0.7031(5) 0.0402(15) Uani 1 2 d S . .
O1 O -0.1900(10) 0.2500 0.1973(6) 0.0220(13) Uani 1 2 d S . .
O2 O 0.1179(9) 0.1387(5) 0.1107(6) 0.0411(14) Uani 1 1 d . . .
O3 O 0.2446(12) 0.2500 0.3248(6) 0.041(2) Uani 1 2 d S . .
 
loop_
 _atom_site_aniso_label
 _atom_site_aniso_U_11
 _atom_site_aniso_U_22
 _atom_site_aniso_U_33
 _atom_site_aniso_U_23
 _atom_site_aniso_U_13
 _atom_site_aniso_U_12
Ti1 0.0159(7) 0.0067(6) 0.0171(7) -0.0018(5) 0.0040(5) -0.0003(5)
Ti2 0.0174(7) 0.0119(7) 0.0129(7) 0.000 0.0013(5) 0.000
P1 0.0181(10) 0.0076(9) 0.0112(9) 0.000 0.0015(7) 0.000
K1 0.0400(11) 0.0223(10) 0.0373(11) 0.0022(8) 0.0148(9) -0.0013(9)
N1 0.0400(11) 0.0223(10) 0.0373(11) 0.0022(8) 0.0148(9) -0.0013(9)
K2 0.0215(10) 0.0356(11) 0.0217(10) 0.000 0.0020(7) 0.000
K3 0.0260(10) 0.0388(12) 0.0296(11) 0.000 0.0028(8) 0.000
F1 0.029(2) 0.042(2) 0.046(2) 0.005(2) 0.0003(18) 0.0152(19)
F2 0.040(2) 0.039(2) 0.036(2) 0.0021(19) 0.0227(18) -0.0078(19)
F3 0.029(2) 0.027(2) 0.054(2) 0.0017(19) 0.0044(19) -0.0132(17)
F4 0.0266(18) 0.0164(18) 0.037(2) -0.0030(15) 0.0024(16) 0.0058(15)
F5 0.036(3) 0.067(4) 0.014(2) 0.000 0.001(2) 0.000
O1 0.022(3) 0.022(3) 0.022(3) 0.000 0.007(2) 0.000
O2 0.033(3) 0.030(3) 0.065(3) -0.033(3) 0.023(2) -0.012(2)
O3 0.024(3) 0.084(6) 0.012(3) 0.000 0.000(3) 0.000
 
_geom_special_details
;
 All esds (except the esd in the dihedral angle between two l.s. planes)
 are estimated using the full covariance matrix.  The cell esds are taken
 into account individually in the estimation of esds in distances, angles
 and torsion angles; correlations between esds in cell parameters are only
 used when they are defined by crystal symmetry.  An approximate (isotropic)
 treatment of cell esds is used for estimating esds involving l.s. planes.
;
 
loop_
 _geom_bond_atom_site_label_1
 _geom_bond_atom_site_label_2
 _geom_bond_distance
 _geom_bond_site_symmetry_2
 _geom_bond_publ_flag
Ti1 F1 1.858(4) . ?
Ti1 F1 1.858(4) 3 ?
Ti1 F2 1.864(4) 3 ?
Ti1 F2 1.864(4) . ?
Ti1 O2 1.914(4) 3 ?
Ti1 O2 1.914(4) . ?
Ti1 K3 3.9010(16) 3_556 ?
Ti1 K3 3.9010(16) 1_554 ?
Ti1 K2 3.9034(15) . ?
Ti1 K2 3.9034(15) 3 ?
Ti1 K2 4.1842(16) 3_655 ?
Ti1 K2 4.1842(16) 1_455 ?
Ti2 F3 1.834(4) . ?
Ti2 F3 1.834(4) 4_565 ?
Ti2 F4 1.867(4) 4_565 ?
Ti2 F4 1.867(4) . ?
Ti2 F5 1.875(5) . ?
Ti2 O3 1.884(6) . ?
Ti2 K3 3.537(3) 1_655 ?
Ti2 K3 3.600(3) . ?
Ti2 K1 3.686(2) 2_556 ?
Ti2 K1 3.686(2) 3_556 ?
Ti2 K1 3.994(2) 1_655 ?
Ti2 K1 3.994(2) 4_665 ?
P1 O1 1.498(6) . ?
P1 O2 1.534(5) . ?
P1 O2 1.534(5) 4_565 ?
P1 O3 1.544(6) . ?
P1 K2 3.620(3) . ?
P1 K2 3.640(3) 1_455 ?
P1 K1 3.806(3) . ?
P1 K1 3.806(3) 4_565 ?
K1 F4 2.747(4) 1_455 ?
K1 F2 2.789(4) 3 ?
K1 F4 2.796(4) 3_556 ?
K1 F3 2.816(4) . ?
K1 O1 2.834(4) . ?
K1 F3 2.931(5) 3_556 ?
K1 F1 3.067(5) 3_455 ?
K1 O3 3.251(5) 1_455 ?
K1 F5 3.297(2) 3_556 ?
K1 O2 3.378(6) 1_455 ?
K1 Ti2 3.686(2) 3_556 ?
K1 H1A 0.8597 . ?
K1 H1B 0.8600 . ?
K1 H1C 0.8604 . ?
K1 H1D 0.8597 . ?
K2 F5 2.614(6) 1_554 ?
K2 F1 2.670(4) 4_665 ?
K2 F1 2.670(4) 1_655 ?
K2 O1 2.679(6) 1_655 ?
K2 F2 2.762(4) . ?
K2 F2 2.762(4) 4_565 ?
K2 O2 3.009(5) . ?
K2 O2 3.009(5) 4_565 ?
K2 P1 3.640(3) 1_655 ?
K2 K3 3.658(3) 1_554 ?
K3 F4 2.700(4) 1_455 ?
K3 F4 2.700(4) 4_465 ?
K3 F5 2.773(6) . ?
K3 F1 2.886(5) 4_566 ?
K3 F1 2.886(5) 1_556 ?
K3 F2 2.935(5) 4_566 ?
K3 F2 2.935(5) 1_556 ?
K3 F3 2.979(5) . ?
K3 F3 2.979(5) 4_565 ?
K3 F5 3.121(6) 1_455 ?
K3 Ti2 3.537(3) 1_455 ?
F1 K2 2.670(4) 1_455 ?
F1 K3 2.886(5) 1_554 ?
F1 K1 3.067(5) 3_455 ?
F2 K1 2.789(4) 3 ?
F2 K3 2.935(5) 1_554 ?
F3 K1 2.931(5) 3_556 ?
F4 K3 2.700(4) 1_655 ?
F4 K1 2.747(4) 1_655 ?
F4 K1 2.796(4) 3_556 ?
F5 K2 2.614(6) 1_556 ?
F5 K3 3.121(6) 1_655 ?
F5 K1 3.297(2) 2_556 ?
F5 K1 3.297(2) 3_556 ?
O1 K2 2.679(6) 1_455 ?
O1 K1 2.834(4) 4_565 ?
O2 K1 3.378(6) 1_655 ?
O3 K1 3.251(5) 4_665 ?
O3 K1 3.251(5) 1_655 ?
 
loop_
 _geom_angle_atom_site_label_1
 _geom_angle_atom_site_label_2
 _geom_angle_atom_site_label_3
 _geom_angle
 _geom_angle_site_symmetry_1
 _geom_angle_site_symmetry_3
 _geom_angle_publ_flag
F1 Ti1 F1 180.0(3) . 3 ?
F1 Ti1 F2 90.98(19) . 3 ?
F1 Ti1 F2 89.02(19) 3 3 ?
F1 Ti1 F2 89.02(19) . . ?
F1 Ti1 F2 90.98(19) 3 . ?
F2 Ti1 F2 180.0(3) 3 . ?
F1 Ti1 O2 88.4(2) . 3 ?
F1 Ti1 O2 91.6(2) 3 3 ?
F2 Ti1 O2 88.7(2) 3 3 ?
F2 Ti1 O2 91.3(2) . 3 ?
F1 Ti1 O2 91.6(2) . . ?
F1 Ti1 O2 88.4(2) 3 . ?
F2 Ti1 O2 91.3(2) 3 . ?
F2 Ti1 O2 88.7(2) . . ?
O2 Ti1 O2 180.0(3) 3 . ?
F1 Ti1 K3 135.50(14) . 3_556 ?
F1 Ti1 K3 44.50(14) 3 3_556 ?
F2 Ti1 K3 46.14(14) 3 3_556 ?
F2 Ti1 K3 133.86(14) . 3_556 ?
O2 Ti1 K3 80.64(19) 3 3_556 ?
O2 Ti1 K3 99.36(19) . 3_556 ?
F1 Ti1 K3 44.50(14) . 1_554 ?
F1 Ti1 K3 135.50(14) 3 1_554 ?
F2 Ti1 K3 133.86(14) 3 1_554 ?
F2 Ti1 K3 46.14(14) . 1_554 ?
O2 Ti1 K3 99.36(19) 3 1_554 ?
O2 Ti1 K3 80.64(19) . 1_554 ?
K3 Ti1 K3 180.0 3_556 1_554 ?
F1 Ti1 K2 95.29(14) . . ?
F1 Ti1 K2 84.71(14) 3 . ?
F2 Ti1 K2 139.61(13) 3 . ?
F2 Ti1 K2 40.39(13) . . ?
O2 Ti1 K2 131.23(16) 3 . ?
O2 Ti1 K2 48.77(16) . . ?
K3 Ti1 K2 124.09(4) 3_556 . ?
K3 Ti1 K2 55.91(4) 1_554 . ?
F1 Ti1 K2 84.71(14) . 3 ?
F1 Ti1 K2 95.29(14) 3 3 ?
F2 Ti1 K2 40.39(13) 3 3 ?
F2 Ti1 K2 139.61(13) . 3 ?
O2 Ti1 K2 48.77(16) 3 3 ?
O2 Ti1 K2 131.23(16) . 3 ?
K3 Ti1 K2 55.91(4) 3_556 3 ?
K3 Ti1 K2 124.09(4) 1_554 3 ?
K2 Ti1 K2 180.00(6) . 3 ?
F1 Ti1 K2 152.82(14) . 3_655 ?
F1 Ti1 K2 27.18(14) 3 3_655 ?
F2 Ti1 K2 105.02(14) 3 3_655 ?
F2 Ti1 K2 74.98(14) . 3_655 ?
O2 Ti1 K2 70.48(16) 3 3_655 ?
O2 Ti1 K2 109.52(16) . 3_655 ?
K3 Ti1 K2 59.43(4) 3_556 3_655 ?
K3 Ti1 K2 120.57(4) 1_554 3_655 ?
K2 Ti1 K2 86.676(17) . 3_655 ?
K2 Ti1 K2 93.324(17) 3 3_655 ?
F1 Ti1 K2 27.18(14) . 1_455 ?
F1 Ti1 K2 152.82(14) 3 1_455 ?
F2 Ti1 K2 74.98(14) 3 1_455 ?
F2 Ti1 K2 105.02(14) . 1_455 ?
O2 Ti1 K2 109.52(16) 3 1_455 ?
O2 Ti1 K2 70.48(16) . 1_455 ?
K3 Ti1 K2 120.57(4) 3_556 1_455 ?
K3 Ti1 K2 59.43(4) 1_554 1_455 ?
K2 Ti1 K2 93.324(17) . 1_455 ?
K2 Ti1 K2 86.676(17) 3 1_455 ?
K2 Ti1 K2 180.0 3_655 1_455 ?
F3 Ti2 F3 89.8(3) . 4_565 ?
F3 Ti2 F4 174.4(2) . 4_565 ?
F3 Ti2 F4 91.00(17) 4_565 4_565 ?
F3 Ti2 F4 91.00(17) . . ?
F3 Ti2 F4 174.4(2) 4_565 . ?
F4 Ti2 F4 87.7(2) 4_565 . ?
F3 Ti2 F5 87.6(2) . . ?
F3 Ti2 F5 87.59(19) 4_565 . ?
F4 Ti2 F5 86.88(18) 4_565 . ?
F4 Ti2 F5 86.88(18) . . ?
F3 Ti2 O3 94.8(2) . . ?
F3 Ti2 O3 94.8(2) 4_565 . ?
F4 Ti2 O3 90.72(19) 4_565 . ?
F4 Ti2 O3 90.72(19) . . ?
F5 Ti2 O3 176.7(3) . . ?
F3 Ti2 K3 127.06(14) . 1_655 ?
F3 Ti2 K3 127.06(14) 4_565 1_655 ?
F4 Ti2 K3 48.76(11) 4_565 1_655 ?
F4 Ti2 K3 48.76(11) . 1_655 ?
F5 Ti2 K3 61.71(19) . 1_655 ?
O3 Ti2 K3 115.0(2) . 1_655 ?
F3 Ti2 K3 55.66(15) . . ?
F3 Ti2 K3 55.66(15) 4_565 . ?
F4 Ti2 K3 120.71(13) 4_565 . ?
F4 Ti2 K3 120.71(13) . . ?
F5 Ti2 K3 49.39(19) . . ?
O3 Ti2 K3 133.9(2) . . ?
K3 Ti2 K3 111.10(7) 1_655 . ?
F3 Ti2 K1 129.82(15) . 2_556 ?
F3 Ti2 K1 51.81(13) 4_565 2_556 ?
F4 Ti2 K1 47.74(12) 4_565 2_556 ?
F4 Ti2 K1 124.22(13) . 2_556 ?
F5 Ti2 K1 63.19(4) . 2_556 ?
O3 Ti2 K1 116.60(4) . 2_556 ?
K3 Ti2 K1 75.46(4) 1_655 2_556 ?
K3 Ti2 K1 74.85(4) . 2_556 ?
F3 Ti2 K1 51.81(13) . 3_556 ?
F3 Ti2 K1 129.82(15) 4_565 3_556 ?
F4 Ti2 K1 124.22(13) 4_565 3_556 ?
F4 Ti2 K1 47.74(12) . 3_556 ?
F5 Ti2 K1 63.19(4) . 3_556 ?
O3 Ti2 K1 116.60(4) . 3_556 ?
K3 Ti2 K1 75.46(4) 1_655 3_556 ?
K3 Ti2 K1 74.85(4) . 3_556 ?
K1 Ti2 K1 126.13(8) 2_556 3_556 ?
F3 Ti2 K1 93.79(14) . 1_655 ?
F3 Ti2 K1 148.34(16) 4_565 1_655 ?
F4 Ti2 K1 88.44(13) 4_565 1_655 ?
F4 Ti2 K1 37.12(12) . 1_655 ?
F5 Ti2 K1 123.96(15) . 1_655 ?
O3 Ti2 K1 53.60(15) . 1_655 ?
K3 Ti2 K1 73.91(5) 1_655 1_655 ?
K3 Ti2 K1 146.18(3) . 1_655 ?
K1 Ti2 K1 136.18(5) 2_556 1_655 ?
K1 Ti2 K1 74.34(5) 3_556 1_655 ?
F3 Ti2 K1 148.34(16) . 4_665 ?
F3 Ti2 K1 93.79(14) 4_565 4_665 ?
F4 Ti2 K1 37.12(12) 4_565 4_665 ?
F4 Ti2 K1 88.44(13) . 4_665 ?
F5 Ti2 K1 123.96(15) . 4_665 ?
O3 Ti2 K1 53.60(15) . 4_665 ?
K3 Ti2 K1 73.91(5) 1_655 4_665 ?
K3 Ti2 K1 146.18(3) . 4_665 ?
K1 Ti2 K1 74.34(5) 2_556 4_665 ?
K1 Ti2 K1 136.18(5) 3_556 4_665 ?
K1 Ti2 K1 67.57(6) 1_655 4_665 ?
O1 P1 O2 113.8(2) . . ?
O1 P1 O2 113.8(2) . 4_565 ?
O2 P1 O2 106.1(4) . 4_565 ?
O1 P1 O3 112.6(4) . . ?
O2 P1 O3 104.9(3) . . ?
O2 P1 O3 104.9(3) 4_565 . ?
O1 P1 K2 148.6(2) . . ?
O2 P1 K2 54.8(2) . . ?
O2 P1 K2 54.8(2) 4_565 . ?
O3 P1 K2 98.8(3) . . ?
O2 P1 K2 91.1(2) . 1_455 ?
O2 P1 K2 91.1(2) 4_565 1_455 ?
O3 P1 K2 152.9(3) . 1_455 ?
K2 P1 K2 108.33(7) . 1_455 ?
O2 P1 K1 88.1(2) . . ?
O2 P1 K1 154.0(2) 4_565 . ?
O3 P1 K1 92.0(2) . . ?
K2 P1 K1 142.80(4) . . ?
K2 P1 K1 66.39(5) 1_455 . ?
O2 P1 K1 154.0(2) . 4_565 ?
O2 P1 K1 88.1(2) 4_565 4_565 ?
O3 P1 K1 92.0(2) . 4_565 ?
K2 P1 K1 142.80(4) . 4_565 ?
K2 P1 K1 66.39(5) 1_455 4_565 ?
K1 P1 K1 71.41(7) . 4_565 ?
F4 K1 F2 170.01(14) 1_455 3 ?
F4 K1 F4 66.08(13) 1_455 3_556 ?
F2 K1 F4 110.67(13) 3 3_556 ?
F4 K1 F3 72.28(13) 1_455 . ?
F2 K1 F3 100.03(14) 3 . ?
F4 K1 F3 102.98(13) 3_556 . ?
F4 K1 O1 107.26(14) 1_455 . ?
F2 K1 O1 75.64(14) 3 . ?
F4 K1 O1 173.19(15) 3_556 . ?
F3 K1 O1 72.84(15) . . ?
F4 K1 F3 88.37(13) 1_455 3_556 ?
F2 K1 F3 82.32(14) 3 3_556 ?
F4 K1 F3 54.83(11) 3_556 3_556 ?
F3 K1 F3 62.61(14) . 3_556 ?
O1 K1 F3 125.31(15) . 3_556 ?
F4 K1 F1 117.45(13) 1_455 3_455 ?
F2 K1 F1 69.35(12) 3 3_455 ?
F4 K1 F1 76.12(12) 3_556 3_455 ?
F3 K1 F1 167.68(14) . 3_455 ?
O1 K1 F1 109.14(16) . 3_455 ?
F3 K1 F1 108.54(13) 3_556 3_455 ?
F4 K1 O3 52.02(14) 1_455 1_455 ?
F2 K1 O3 137.63(16) 3 1_455 ?
F4 K1 O3 96.91(13) 3_556 1_455 ?
F3 K1 O3 104.44(14) . 1_455 ?
O1 K1 O3 79.25(14) . 1_455 ?
F3 K1 O3 139.82(16) 3_556 1_455 ?
F1 K1 O3 87.84(13) 3_455 1_455 ?
F4 K1 F5 114.25(14) 1_455 3_556 ?
F2 K1 F5 61.57(14) 3 3_556 ?
F4 K1 F5 49.12(13) 3_556 3_556 ?
F3 K1 F5 109.28(15) . 3_556 ?
O1 K1 F5 137.02(15) . 3_556 ?
F3 K1 F5 48.24(12) 3_556 3_556 ?
F1 K1 F5 60.62(13) 3_455 3_556 ?
O3 K1 F5 136.23(15) 1_455 3_556 ?
F4 K1 O2 90.36(12) 1_455 1_455 ?
F2 K1 O2 99.54(13) 3 1_455 ?
F4 K1 O2 98.76(13) 3_556 1_455 ?
F3 K1 O2 143.22(14) . 1_455 ?
O1 K1 O2 82.33(15) . 1_455 ?
F3 K1 O2 151.26(13) 3_556 1_455 ?
F1 K1 O2 47.87(11) 3_455 1_455 ?
O3 K1 O2 43.14(13) 1_455 1_455 ?
F5 K1 O2 107.40(14) 3_556 1_455 ?
F4 K1 Ti2 86.30(9) 1_455 3_556 ?
F2 K1 Ti2 87.34(10) 3 3_556 ?
F4 K1 Ti2 29.62(8) 3_556 3_556 ?
F3 K1 Ti2 89.94(10) . 3_556 ?
O1 K1 Ti2 152.88(13) . 3_556 ?
F3 K1 Ti2 29.46(8) 3_556 3_556 ?
F1 K1 Ti2 83.48(10) 3_455 3_556 ?
O3 K1 Ti2 126.23(11) 1_455 3_556 ?
F5 K1 Ti2 30.50(9) 3_556 3_556 ?
O2 K1 Ti2 121.82(11) 1_455 3_556 ?
F4 K1 P1 116.25(10) 1_455 . ?
F2 K1 P1 63.53(10) 3 . ?
F4 K1 P1 161.04(11) 3_556 . ?
F3 K1 P1 62.44(10) . . ?
O1 K1 P1 20.00(11) . . ?
F3 K1 P1 106.26(10) 3_556 . ?
F1 K1 P1 115.34(11) 3_455 . ?
O3 K1 P1 98.53(10) 1_455 . ?
F5 K1 P1 121.44(12) 3_556 . ?
O2 K1 P1 100.02(11) 1_455 . ?
Ti2 K1 P1 132.90(7) 3_556 . ?
F4 K1 H1A 70.6 1_455 . ?
F2 K1 H1A 99.5 3 . ?
F4 K1 H1A 59.1 3_556 . ?
F3 K1 H1A 46.9 . . ?
O1 K1 H1A 118.2 . . ?
F3 K1 H1A 21.3 3_556 . ?
F1 K1 H1A 126.8 3_455 . ?
O3 K1 H1A 122.5 1_455 . ?
F5 K1 H1A 68.4 3_556 . ?
O2 K1 H1A 154.9 1_455 . ?
Ti2 K1 H1A 43.4 3_556 . ?
P1 K1 H1A 103.0 . . ?
F4 K1 H1B 122.5 1_455 . ?
F2 K1 H1B 57.5 3 . ?
F4 K1 H1B 160.3 3_556 . ?
F3 K1 H1B 66.9 . . ?
O1 K1 H1B 22.7 . . ?
F3 K1 H1B 106.0 3_556 . ?
F1 K1 H1B 110.0 3_455 . ?
O3 K1 H1B 102.0 1_455 . ?
F5 K1 H1B 116.4 3_556 . ?
O2 K1 H1B 98.8 1_455 . ?
Ti2 K1 H1B 130.8 3_556 . ?
P1 K1 H1B 6.3 . . ?
H1A K1 H1B 105.1 . . ?
F4 K1 H1C 132.7 1_455 . ?
F2 K1 H1C 50.5 3 . ?
F4 K1 H1C 72.8 3_556 . ?
F3 K1 H1C 141.4 . . ?
O1 K1 H1C 113.9 . . ?
F3 K1 H1C 86.4 3_556 . ?
F1 K1 H1C 26.4 3_455 . ?
O3 K1 H1C 114.2 1_455 . ?
F5 K1 H1C 38.8 3_556 . ?
O2 K1 H1C 73.6 1_455 . ?
Ti2 K1 H1C 67.3 3_556 . ?
P1 K1 H1C 110.3 . . ?
H1A K1 H1C 107.1 . . ?
H1B K1 H1C 104.0 . . ?
F4 K1 H1D 44.6 1_455 . ?
F2 K1 H1D 145.2 3 . ?
F4 K1 H1D 89.9 3_556 . ?
F3 K1 H1D 102.2 . . ?
O1 K1 H1D 85.9 . . ?
F3 K1 H1D 131.8 3_556 . ?
F1 K1 H1D 90.1 3_455 . ?
O3 K1 H1D 8.1 1_455 . ?
F5 K1 H1D 132.3 3_556 . ?
O2 K1 H1D 48.2 1_455 . ?
Ti2 K1 H1D 118.8 3_556 . ?
P1 K1 H1D 104.6 . . ?
H1A K1 H1D 115.2 . . ?
H1B K1 H1D 108.5 . . ?
H1C K1 H1D 115.9 . . ?
F5 K2 F1 75.02(14) 1_554 4_665 ?
F5 K2 F1 75.02(14) 1_554 1_655 ?
F1 K2 F1 85.7(2) 4_665 1_655 ?
F5 K2 O1 145.7(2) 1_554 1_655 ?
F1 K2 O1 80.00(13) 4_665 1_655 ?
F1 K2 O1 80.00(13) 1_655 1_655 ?
F5 K2 F2 71.56(12) 1_554 . ?
F1 K2 F2 144.94(14) 4_665 . ?
F1 K2 F2 75.86(13) 1_655 . ?
O1 K2 F2 124.37(10) 1_655 . ?
F5 K2 F2 71.56(12) 1_554 4_565 ?
F1 K2 F2 75.86(13) 4_665 4_565 ?
F1 K2 F2 144.94(14) 1_655 4_565 ?
O1 K2 F2 124.37(10) 1_655 4_565 ?
F2 K2 F2 102.81(19) . 4_565 ?
F5 K2 O2 118.73(17) 1_554 . ?
F1 K2 O2 159.09(14) 4_665 . ?
F1 K2 O2 112.33(14) 1_655 . ?
O1 K2 O2 92.36(17) 1_655 . ?
F2 K2 O2 54.28(12) . . ?
F2 K2 O2 93.05(14) 4_565 . ?
F5 K2 O2 118.73(17) 1_554 4_565 ?
F1 K2 O2 112.33(14) 4_665 4_565 ?
F1 K2 O2 159.09(14) 1_655 4_565 ?
O1 K2 O2 92.36(17) 1_655 4_565 ?
F2 K2 O2 93.05(14) . 4_565 ?
F2 K2 O2 54.28(12) 4_565 4_565 ?
O2 K2 O2 48.09(18) . 4_565 ?
F5 K2 P1 127.23(15) 1_554 . ?
F1 K2 P1 134.65(10) 4_665 . ?
F1 K2 P1 134.65(10) 1_655 . ?
O1 K2 P1 87.12(14) 1_655 . ?
F2 K2 P1 76.31(9) . . ?
F2 K2 P1 76.31(9) 4_565 . ?
O2 K2 P1 24.62(9) . . ?
O2 K2 P1 24.62(9) 4_565 . ?
F5 K2 P1 124.44(15) 1_554 1_655 ?
F1 K2 P1 65.18(10) 4_665 1_655 ?
F1 K2 P1 65.18(10) 1_655 1_655 ?
O1 K2 P1 21.21(13) 1_655 1_655 ?
F2 K2 P1 128.48(10) . 1_655 ?
F2 K2 P1 128.48(9) 4_565 1_655 ?
O2 K2 P1 111.62(12) . 1_655 ?
O2 K2 P1 111.62(12) 4_565 1_655 ?
P1 K2 P1 108.33(7) . 1_655 ?
F5 K2 K3 49.08(14) 1_554 1_554 ?
F1 K2 K3 110.44(10) 4_665 1_554 ?
F1 K2 K3 110.44(10) 1_655 1_554 ?
O1 K2 K3 165.27(15) 1_655 1_554 ?
F2 K2 K3 52.16(10) . 1_554 ?
F2 K2 K3 52.16(9) 4_565 1_554 ?
O2 K2 K3 74.23(12) . 1_554 ?
O2 K2 K3 74.23(12) 4_565 1_554 ?
P1 K2 K3 78.15(6) . 1_554 ?
P1 K2 K3 173.52(8) 1_655 1_554 ?
F5 K2 Ti1 95.39(10) 1_554 . ?
F1 K2 Ti1 170.40(11) 4_665 . ?
F1 K2 Ti1 91.53(10) 1_655 . ?
O1 K2 Ti1 108.59(9) 1_655 . ?
F2 K2 Ti1 25.93(8) . . ?
F2 K2 Ti1 101.73(10) 4_565 . ?
O2 K2 Ti1 28.59(9) . . ?
O2 K2 Ti1 72.35(11) 4_565 . ?
P1 K2 Ti1 51.96(3) . . ?
P1 K2 Ti1 121.75(4) 1_655 . ?
K3 K2 Ti1 62.01(4) 1_554 . ?
F4 K3 F4 57.23(15) 1_455 4_465 ?
F4 K3 F5 123.24(14) 1_455 . ?
F4 K3 F5 123.24(14) 4_465 . ?
F4 K3 F1 116.18(13) 1_455 4_566 ?
F4 K3 F1 80.73(12) 4_465 4_566 ?
F5 K3 F1 119.65(12) . 4_566 ?
F4 K3 F1 80.73(12) 1_455 1_556 ?
F4 K3 F1 116.18(13) 4_465 1_556 ?
F5 K3 F1 119.65(12) . 1_556 ?
F1 K3 F1 77.95(18) 4_566 1_556 ?
F4 K3 F2 161.11(12) 1_455 4_566 ?
F4 K3 F2 103.99(11) 4_465 4_566 ?
F5 K3 F2 66.81(11) . 4_566 ?
F1 K3 F2 53.24(11) 4_566 4_566 ?
F1 K3 F2 109.07(14) 1_556 4_566 ?
F4 K3 F2 103.99(11) 1_455 1_556 ?
F4 K3 F2 161.11(12) 4_465 1_556 ?
F5 K3 F2 66.81(11) . 1_556 ?
F1 K3 F2 109.07(14) 4_566 1_556 ?
F1 K3 F2 53.24(11) 1_556 1_556 ?
F2 K3 F2 94.70(17) 4_566 1_556 ?
F4 K3 F3 70.40(11) 1_455 . ?
F4 K3 F3 94.64(13) 4_465 . ?
F5 K3 F3 52.86(12) . . ?
F1 K3 F3 166.61(12) 4_566 . ?
F1 K3 F3 115.22(12) 1_556 . ?
F2 K3 F3 116.77(12) 4_566 . ?
F2 K3 F3 79.11(12) 1_556 . ?
F4 K3 F3 94.64(13) 1_455 4_565 ?
F4 K3 F3 70.40(11) 4_465 4_565 ?
F5 K3 F3 52.86(12) . 4_565 ?
F1 K3 F3 115.22(12) 4_566 4_565 ?
F1 K3 F3 166.61(12) 1_556 4_565 ?
F2 K3 F3 79.11(12) 4_566 4_565 ?
F2 K3 F3 116.77(12) 1_556 4_565 ?
F3 K3 F3 51.52(16) . 4_565 ?
F4 K3 F5 51.85(11) 1_455 1_455 ?
F4 K3 F5 51.85(11) 4_465 1_455 ?
F5 K3 F5 173.9(2) . 1_455 ?
F1 K3 F5 64.64(11) 4_566 1_455 ?
F1 K3 F5 64.64(11) 1_556 1_455 ?
F2 K3 F5 116.74(10) 4_566 1_455 ?
F2 K3 F5 116.74(10) 1_556 1_455 ?
F3 K3 F5 121.98(13) . 1_455 ?
F3 K3 F5 121.98(13) 4_565 1_455 ?
F4 K3 Ti2 31.33(8) 1_455 1_455 ?
F4 K3 Ti2 31.33(8) 4_465 1_455 ?
F5 K3 Ti2 141.99(13) . 1_455 ?
F1 K3 Ti2 88.83(9) 4_566 1_455 ?
F1 K3 Ti2 88.83(9) 1_556 1_455 ?
F2 K3 Ti2 130.53(9) 4_566 1_455 ?
F2 K3 Ti2 130.53(9) 1_556 1_455 ?
F3 K3 Ti2 93.67(9) . 1_455 ?
F3 K3 Ti2 93.67(9) 4_565 1_455 ?
F5 K3 Ti2 31.94(10) 1_455 1_455 ?
F4 K3 Ti2 96.81(10) 1_455 . ?
F4 K3 Ti2 96.81(10) 4_465 . ?
F5 K3 Ti2 30.88(11) . . ?
F1 K3 Ti2 137.09(9) 4_566 . ?
F1 K3 Ti2 137.09(9) 1_556 . ?
F2 K3 Ti2 86.85(9) 4_566 . ?
F2 K3 Ti2 86.85(9) 1_556 . ?
F3 K3 Ti2 30.55(8) . . ?
F3 K3 Ti2 30.55(7) 4_565 . ?
F5 K3 Ti2 143.04(12) 1_455 . ?
Ti2 K3 Ti2 111.10(7) 1_455 . ?
Ti1 F1 K2 134.3(2) . 1_455 ?
Ti1 F1 K3 108.68(18) . 1_554 ?
K2 F1 K3 92.47(14) 1_455 1_554 ?
Ti1 F1 K1 118.9(2) . 3_455 ?
K2 F1 K1 97.70(13) 1_455 3_455 ?
K3 F1 K1 95.87(13) 1_554 3_455 ?
Ti1 F2 K2 113.68(18) . . ?
Ti1 F2 K1 137.3(2) . 3 ?
K2 F2 K1 102.45(13) . 3 ?
Ti1 F2 K3 106.62(17) . 1_554 ?
K2 F2 K3 79.84(12) . 1_554 ?
K1 F2 K3 101.32(13) 3 1_554 ?
Ti2 F3 K1 137.2(2) . . ?
Ti2 F3 K1 98.73(16) . 3_556 ?
K1 F3 K1 117.39(14) . 3_556 ?
Ti2 F3 K3 93.79(17) . . ?
K1 F3 K3 103.18(13) . . ?
K1 F3 K3 97.06(14) 3_556 . ?
Ti2 F4 K3 99.91(15) . 1_655 ?
Ti2 F4 K1 118.67(17) . 1_655 ?
K3 F4 K1 112.99(14) 1_655 1_655 ?
Ti2 F4 K1 102.64(16) . 3_556 ?
K3 F4 K1 107.12(13) 1_655 3_556 ?
K1 F4 K1 113.92(13) 1_655 3_556 ?
Ti2 F5 K2 174.8(3) . 1_556 ?
Ti2 F5 K3 99.7(2) . . ?
K2 F5 K3 85.50(18) 1_556 . ?
Ti2 F5 K3 86.4(2) . 1_655 ?
K2 F5 K3 88.42(17) 1_556 1_655 ?
K3 F5 K3 173.9(2) . 1_655 ?
Ti2 F5 K1 86.31(10) . 2_556 ?
K2 F5 K1 93.43(10) 1_556 2_556 ?
K3 F5 K1 93.31(11) . 2_556 ?
K3 F5 K1 87.05(11) 1_655 2_556 ?
Ti2 F5 K1 86.31(10) . 3_556 ?
K2 F5 K1 93.43(10) 1_556 3_556 ?
K3 F5 K1 93.31(11) . 3_556 ?
K3 F5 K1 87.05(11) 1_655 3_556 ?
K1 F5 K1 170.8(2) 2_556 3_556 ?
P1 O1 K2 118.5(3) . 1_455 ?
P1 O1 K1 119.68(17) . 4_565 ?
K2 O1 K1 95.38(15) 1_455 4_565 ?
P1 O1 K1 119.68(17) . . ?
K2 O1 K1 95.38(15) 1_455 . ?
K1 O1 K1 103.2(2) 4_565 . ?
P1 O2 Ti1 146.7(3) . . ?
P1 O2 K2 100.6(2) . . ?
Ti1 O2 K2 102.6(2) . . ?
P1 O2 K1 102.9(2) . 1_655 ?
Ti1 O2 K1 104.7(2) . 1_655 ?
K2 O2 K1 79.14(12) . 1_655 ?
P1 O3 Ti2 143.0(4) . . ?
P1 O3 K1 108.1(2) . 4_665 ?
Ti2 O3 K1 98.59(19) . 4_665 ?
P1 O3 K1 108.1(2) . 1_655 ?
Ti2 O3 K1 98.59(19) . 1_655 ?
K1 O3 K1 86.17(18) 4_665 1_655 ?
 
loop_
 _geom_hbond_atom_site_label_D
 _geom_hbond_atom_site_label_H
 _geom_hbond_atom_site_label_A
 _geom_hbond_distance_DH
 _geom_hbond_distance_HA
 _geom_hbond_distance_DA
 _geom_hbond_angle_DHA
 _geom_hbond_site_symmetry_A
N1 H1A F3  0.86 2.15 2.931(5) 150.3 3_556
N1 H1A F3  0.86 2.32 2.816(4) 117.4 .
N1 H1B O1  0.86 2.07 2.834(4) 148.0 .
N1 H1C F1  0.86 2.33 3.067(5) 144.2 3_455
N1 H1C F2  0.86 2.34 2.789(4) 113.0 3
N1 H1D F4  0.86 2.22 2.747(4) 119.6 1_455
N1 H1D O3  0.86 2.40 3.251(5) 169.0 1_455
 
_diffrn_measured_fraction_theta_max    1.000
_diffrn_reflns_theta_full              25.49
_diffrn_measured_fraction_theta_full   1.000
_refine_diff_density_max    0.586
_refine_diff_density_min   -0.688
_refine_diff_density_rms    0.146
